# Supplementary material for: Contrasting microbial communities drive iron cycling across global biomes
Source: Research Square preprint supplement (doi:10.21203/rs.3.rs-4248419/v1), 2024-04-25
Supplement: Supplementary file 1 [file 0ea69c9c82b786ab4d9fa26a.xlsx]

## Sheet: Sheet1
Supplementary Information File 5. Iron-oxidizing microorganisms for filtering MtrABC hits (Epihov and Bryce, 2024)*
genus	group	sub-group
Acidianus	iron oxidizers	acidophilic iron oxidizers		*MtrABC hits matching to these organisms were counted towards the group of iron oxidation genes.
Acidiferrobacter	iron oxidizers	acidophilic iron oxidizers
Acidimicrobium	iron oxidizers	acidophilic iron oxidizers
Acidiplasma	iron oxidizers	acidophilic iron oxidizers
Acidithiobacillus	iron oxidizers	acidophilic iron oxidizers
Acidovorax	iron oxidizers	acidophilic iron oxidizers
Alicyclobacillus	iron oxidizers	acidophilic iron oxidizers
Aquifex	iron oxidizers	acidophilic iron oxidizers
Chlorobium	iron oxidizers	acidophilic iron oxidizers
Ferrimicrobium	iron oxidizers	acidophilic iron oxidizers
Ferrithrix	iron oxidizers	acidophilic iron oxidizers
Ferroplasma	iron oxidizers	acidophilic iron oxidizers
Ferrovum	iron oxidizers	acidophilic iron oxidizers
Leptospirillum	iron oxidizers	acidophilic iron oxidizers
Mariprofundus	iron oxidizers	acidophilic iron oxidizers
Metallosphaera	iron oxidizers	acidophilic iron oxidizers
Pseudogulbenkiania	iron oxidizers	acidophilic iron oxidizers
Rhodanobacter	iron oxidizers	acidophilic iron oxidizers
Rhodomicrobium	iron oxidizers	acidophilic iron oxidizers
Rhodopseudomonas	iron oxidizers	acidophilic iron oxidizers
Rhodovulum	iron oxidizers	acidophilic iron oxidizers
Sphaerotilus	iron oxidizers	acidophilic iron oxidizers
Sulfolobus	iron oxidizers	acidophilic iron oxidizers
Thiobacillus	iron oxidizers	acidophilic iron oxidizers
GJ-E10 (Ca. Ferrobasaltibacterium, gen. nov.)	iron oxidizers	acidophilic iron oxidizers
Ferritrophicum	iron oxidizers	neutrophilic iron oxidizers
Ferroglobus	iron oxidizers	neutrophilic iron oxidizers
Ferrovibrio	iron oxidizers	neutrophilic iron oxidizers
Gallionella	iron oxidizers	neutrophilic iron oxidizers
Leptothrix	iron oxidizers	neutrophilic iron oxidizers
Marinobacter	iron oxidizers	neutrophilic iron oxidizers
Siderocapsa	iron oxidizers	neutrophilic iron oxidizers
13-2-20CM-66-19	iron oxidizers	putative iron oxidizers
20-60-12	iron oxidizers	putative iron oxidizers
20CM-2-65-7	iron oxidizers	putative iron oxidizers
20CM-4-69-16	iron oxidizers	putative iron oxidizers
21-64-14	iron oxidizers	putative iron oxidizers
40CM-2-70-7	iron oxidizers	putative iron oxidizers
Accumulibacter	iron oxidizers	putative iron oxidizers
Acidihalobacter	iron oxidizers	putative iron oxidizers
Acidiphilium	iron oxidizers	putative iron oxidizers
Acidipila	iron oxidizers	putative iron oxidizers
Acidocella	iron oxidizers	putative iron oxidizers
AG29	iron oxidizers	putative iron oxidizers
AR5	iron oxidizers	putative iron oxidizers
Aromatoleum	iron oxidizers	putative iron oxidizers
Azonexus	iron oxidizers	putative iron oxidizers
Azospira	iron oxidizers	putative iron oxidizers
BMS3ABIN03	iron oxidizers	putative iron oxidizers
BMS3ABIN04	iron oxidizers	putative iron oxidizers
BMS3Abin08	iron oxidizers	putative iron oxidizers
BMS3Abin12	iron oxidizers	putative iron oxidizers
BMS3Bbin07	iron oxidizers	putative iron oxidizers
BMS3Bbin11	iron oxidizers	putative iron oxidizers
Bog-105	iron oxidizers	putative iron oxidizers
Bog-1198	iron oxidizers	putative iron oxidizers
Bog-209	iron oxidizers	putative iron oxidizers
BOG-908	iron oxidizers	putative iron oxidizers
BOG-932	iron oxidizers	putative iron oxidizers
BOG-934	iron oxidizers	putative iron oxidizers
BOG-994	iron oxidizers	putative iron oxidizers
Bradyrhizobium	iron oxidizers	putative iron oxidizers
CAU-1509	iron oxidizers	putative iron oxidizers
Chromobacterium	iron oxidizers	putative iron oxidizers
Cupriavidus	iron oxidizers	putative iron oxidizers
Dokdonella_A	iron oxidizers	putative iron oxidizers
Dyella	iron oxidizers	putative iron oxidizers
Dyella_A	iron oxidizers	putative iron oxidizers
Electronema	iron oxidizers	putative iron oxidizers
FEN-1191	iron oxidizers	putative iron oxidizers
Fen-1231	iron oxidizers	putative iron oxidizers
Fen-1245	iron oxidizers	putative iron oxidizers
FEN-1250	iron oxidizers	putative iron oxidizers
Fen-1255	iron oxidizers	putative iron oxidizers
Fen-1258	iron oxidizers	putative iron oxidizers
FEN-1297	iron oxidizers	putative iron oxidizers
Fen-183	iron oxidizers	putative iron oxidizers
Flavobacterium	iron oxidizers	putative iron oxidizers
Fluviicoccus	iron oxidizers	putative iron oxidizers
Gp13-AA74	iron oxidizers	putative iron oxidizers
Ideonella	iron oxidizers	putative iron oxidizers
KS41	iron oxidizers	putative iron oxidizers
Lacunisphaera	iron oxidizers	putative iron oxidizers
Mangrovitalea	iron oxidizers	putative iron oxidizers
Metallibacterium	iron oxidizers	putative iron oxidizers
Methylocella	iron oxidizers	putative iron oxidizers
Methylocystis	iron oxidizers	putative iron oxidizers
Methyloglobulus	iron oxidizers	putative iron oxidizers
Methylomicrobium	iron oxidizers	putative iron oxidizers
Methylomonas	iron oxidizers	putative iron oxidizers
Methylosarcina	iron oxidizers	putative iron oxidizers
Methylotenera	iron oxidizers	putative iron oxidizers
Methyloterricola	iron oxidizers	putative iron oxidizers
Methyloumidiphilus	iron oxidizers	putative iron oxidizers
Methylovulum	iron oxidizers	putative iron oxidizers
Nitrosomonas	iron oxidizers	putative iron oxidizers
Nitrosospira	iron oxidizers	putative iron oxidizers
Novimethylophilus	iron oxidizers	putative iron oxidizers
PALSA-1003	iron oxidizers	putative iron oxidizers
PALSA-1004	iron oxidizers	putative iron oxidizers
PALSA-1180	iron oxidizers	putative iron oxidizers
PALSA-1196	iron oxidizers	putative iron oxidizers
Palsa-1233	iron oxidizers	putative iron oxidizers
Palsa-1248	iron oxidizers	putative iron oxidizers
Palsa-1447	iron oxidizers	putative iron oxidizers
PALSA-188	iron oxidizers	putative iron oxidizers
Palsa-189	iron oxidizers	putative iron oxidizers
Palsa-288	iron oxidizers	putative iron oxidizers
Palsa-360	iron oxidizers	putative iron oxidizers
Palsa-892	iron oxidizers	putative iron oxidizers
PALSA-894	iron oxidizers	putative iron oxidizers
PALSA-926	iron oxidizers	putative iron oxidizers
Paludibacterium	iron oxidizers	putative iron oxidizers
Paraburkholderia	iron oxidizers	putative iron oxidizers
PBB1	iron oxidizers	putative iron oxidizers
PKWO01	iron oxidizers	putative iron oxidizers
Plasticicumulans_A	iron oxidizers	putative iron oxidizers
Pseudomonas_E	iron oxidizers	putative iron oxidizers
RBG-16-57-12	iron oxidizers	putative iron oxidizers
RH2-MAG17b	iron oxidizers	putative iron oxidizers
Rhizomicrobium	iron oxidizers	putative iron oxidizers
Rhodoferax	iron oxidizers	putative iron oxidizers
Rhodoferax_A	iron oxidizers	putative iron oxidizers
Rhodopila	iron oxidizers	putative iron oxidizers
Roseiarcus	iron oxidizers	putative iron oxidizers
Rubrivivax	iron oxidizers	putative iron oxidizers
Rudaea	iron oxidizers	putative iron oxidizers
Schlegelella_A	iron oxidizers	putative iron oxidizers
SCN-70-22	iron oxidizers	putative iron oxidizers
SCRD01	iron oxidizers	putative iron oxidizers
Siderooxydans	iron oxidizers	putative iron oxidizers
Solimonas	iron oxidizers	putative iron oxidizers
Sulfotelmatobacter	iron oxidizers	putative iron oxidizers
Sulfurirhabdus	iron oxidizers	putative iron oxidizers
Sulfurivermis	iron oxidizers	putative iron oxidizers
Sulfurospirillum	iron oxidizers	putative iron oxidizers
SZUA-22	iron oxidizers	putative iron oxidizers
SZUA-53	iron oxidizers	putative iron oxidizers
Terracidiphilus	iron oxidizers	putative iron oxidizers
Thauera	iron oxidizers	putative iron oxidizers
Thiomonas	iron oxidizers	putative iron oxidizers
UBA4720	iron oxidizers	putative iron oxidizers
UBA5172	iron oxidizers	putative iron oxidizers
UBA6024	iron oxidizers	putative iron oxidizers
UBA8904	iron oxidizers	putative iron oxidizers
Uliginosibacterium	iron oxidizers	putative iron oxidizers
XYC2-FULL-35-21	iron oxidizers	putative iron oxidizers
Zoogloea	iron oxidizers	putative iron oxidizers
