# Supplementary material for: Contrasting microbial communities drive iron cycling across global biomes
Source: Research Square preprint supplement (doi:10.21203/rs.3.rs-4248419/v1), 2024-04-25
Supplement: Supplementary file 2 [file b5404a59fe581a152f4d6de7.xlsx]

## Sheet: Sheet1
Unique ID	Source	Investigation_type	Biome	Latitude	Longitude	Country	Substrate	used in benchmarking	from n = 178 selection (1 - included in global Fe cycle analyses, 0 - not included in global Fe cycle analyses, only used for local patterns in the Fe cycle)
mgm4884264.3	MGRAST	metagenome	cultivated environment	40.0672	-88.2015	USA	soil	*	1
mgm4884267.3	MGRAST	metagenome	cultivated environment	40.0672	-88.2015	USA	soil	*	1
mgm4884276.3	MGRAST	metagenome	cultivated environment	40.0672	-88.2015	USA	soil	*	1
mgm4884292.3	MGRAST	metagenome	cultivated environment	40.0672	-88.2015	USA	soil	*	1
mgm4884295.3	MGRAST	metagenome	cultivated environment	40.0672	-88.2015	USA	soil	*	1
mgm4885074.3	MGRAST	metagenome	cultivated environment	40.0672	-88.2015	USA	soil	*	1
ERR2041960	NCBI	metagenome	Peatland, bogs, and flooded grasslands	4.991	-52.454	French Guiana	soil	-	1
ERR2041961	NCBI	metagenome	Peatland, bogs, and flooded grasslands	4.991	-52.454	French Guiana	soil	-	1
ERR2041963	NCBI	metagenome	Peatland, bogs, and flooded grasslands	4.991	-52.454	French Guiana	soil	-	1
ERR2041966	NCBI	metagenome	Peatland, bogs, and flooded grasslands	4.991	-52.454	French Guiana	soil	-	1
mgm4470255.3	MGRAST	metagenome	Tundra biome	64.6778	-157.833	USA	soil	-	1
mgm4470378.3	MGRAST	metagenome	Tundra biome	64.6778	-157.833	USA	soil	-	1
mgm4470382.3	MGRAST	metagenome	Tundra biome	64.6778	-157.833	USA	soil	-	1
mgm4477872.3	MGRAST	metagenome	Deserts and xeric shrubland biome	35.383	-105.933	USA	soil	-	1
mgm4477873.3	MGRAST	metagenome	Deserts and xeric shrubland biome	34.333	-106.733	USA	soil	-	1
mgm4497387.3	MGRAST	metagenome	Tropical forest biome	-11.7413	-56.2533	Brazil	soil	-	1
mgm4497395.3	MGRAST	metagenome	Tropical forest biome	-11.7413	-56.2533	Brazil	soil	-	1
mgm4499915.3	MGRAST	metagenome	cultivated environment	-25.0833	-50.15	Brazil	soil	-	1
mgm4538778.3	MGRAST	metagenome	Peatland, bogs, and flooded grasslands	47.5061	-93.4528	USA	soil	-	1
mgm4538779.3	MGRAST	metagenome	Peatland, bogs, and flooded grasslands	47.5061	-93.4528	USA	soil	-	1
mgm4606863.3	MGRAST	metagenome	Tundra biome	68.7167	158.9	Russia	soil	-	1
mgm4614815.3	MGRAST	metagenome	Temperate forest biome	46.8685	-88.8911	USA	soil	-	1
mgm4614817.3	MGRAST	metagenome	Temperate forest biome	46.8685	-88.8911	USA	soil	-	1
mgm4614827.3	MGRAST	metagenome	Temperate forest biome	44.3902	-85.8442	USA	soil	-	1
mgm4620532.3	MGRAST	metagenome	cultivated environment	48.2056	7.36197	France	soil	-	1
mgm4620533.3	MGRAST	metagenome	cultivated environment	48.2056	7.36197	France	soil	-	1
mgm4623644.3	MGRAST	metagenome	Temperate grassland biome	46.682	-114.027	USA	soil	-	1
mgm4623667.3	MGRAST	metagenome	Temperate grassland biome	46.682	-114.027	USA	soil	-	1
mgm4623699.3	MGRAST	metagenome	Temperate grassland biome	46.682	-114.027	USA	soil	-	1
mgm4626289.3	MGRAST	metagenome	Iron sulfide soils and mine tailings	22.11	112.77	China	soil	-	1
mgm4626291.3	MGRAST	metagenome	Iron sulfide soils and mine tailings	22.11	112.77	China	soil	-	1
mgm4628831.3	MGRAST	metagenome	Iron sulfide soils and mine tailings	22.11	112.77	China	soil	-	1
mgm4633078.3	MGRAST	metagenome	cultivated environment	42.0138	-93.7838	USA	soil	-	1
mgm4633083.3	MGRAST	metagenome	cultivated environment	42.0138	-93.7838	USA	soil	-	1
mgm4633085.3	MGRAST	metagenome	cultivated environment	42.0138	-93.7838	USA	soil	-	1
mgm4664558.3	MGRAST	metagenome	Peatland, bogs, and flooded grasslands	53.1403	-4.07098	United Kingdom	soil	-	1
mgm4664565.3	MGRAST	metagenome	Peatland, bogs, and flooded grasslands	53.1403	-4.07098	United Kingdom	soil	-	1
mgm4664568.3	MGRAST	metagenome	Peatland, bogs, and flooded grasslands	53.1403	-4.07098	United Kingdom	soil	-	1
mgm4664579.3	MGRAST	metagenome	Peatland, bogs, and flooded grasslands	53.1403	-4.07098	United Kingdom	soil	-	1
mgm4664584.3	MGRAST	metagenome	Peatland, bogs, and flooded grasslands	53.1403	-4.07098	United Kingdom	soil	-	1
mgm4664591.3	MGRAST	metagenome	Peatland, bogs, and flooded grasslands	53.1403	-4.07098	United Kingdom	soil	-	1
mgm4667019.3	MGRAST	metagenome	arctic desert	-77.0247	161.759	Antarctica	soil	-	1
mgm4667023.3	MGRAST	metagenome	arctic desert	-77.0182	161.742	Antarctica	soil	-	1
mgm4667029.3	MGRAST	metagenome	arctic desert	-77.0231	161.713	Antarctica	soil	-	1
mgm4698609.3	MGRAST	metagenome	Tropical and subtropical grasslands, savannas, and shrubland biome	-15.1012	-49.0107	Brazil	soil	-	1
mgm4698610.3	MGRAST	metagenome	Tropical and subtropical grasslands, savannas, and shrubland biome	-15.1086	-49.0208	Brazil	soil	-	1
mgm4722852.3	MGRAST	metagenome	Temperate forest biome	46.3	7.617	Switzerland	soil	-	1
mgm4722856.3	MGRAST	metagenome	Temperate forest biome	46.3	7.617	Switzerland	soil	-	1
mgm4722858.3	MGRAST	metagenome	Temperate forest biome	46.3	7.617	Switzerland	soil	-	1
mgm4722958.3	MGRAST	metagenome	Temperate forest biome	40.1717	73.4457	Chile	soil	-	1
mgm4722965.3	MGRAST	metagenome	Temperate forest biome	40.1686	73.4448	Chile	soil	-	1
mgm4722966.3	MGRAST	metagenome	Temperate forest biome	40.1707	73.4437	Chile	soil	-	1
mgm4737779.3	MGRAST	metagenome	Tundra biome	74.28	20.32	forestgreenland	soil	-	1
mgm4737791.3	MGRAST	metagenome	Tundra biome	74.28	20.32	forestgreenland	soil	-	1
mgm4751712.3	MGRAST	metagenome	Tropical forest biome	9.21918	-79.7257	Panama	soil	-	1
mgm4751755.3	MGRAST	metagenome	Tropical forest biome	9.21918	-79.7257	Panama	soil	-	1
mgm4752317.3	MGRAST	metagenome	Tropical forest biome	9.21918	-79.7257	Panama	soil	-	1
mgm4775024.3	MGRAST	metagenome	Tropical forest biome	-2.85664	-54.9579	Brazil	soil	-	1
mgm4775026.3	MGRAST	metagenome	Tropical forest biome	-2.85664	-54.9579	Brazil	soil	-	1
mgm4775400.3	MGRAST	metagenome	Tropical forest biome	-3.26331	-54.8933	Brazil	soil	-	1
mgm4804365.3	MGRAST	metagenome	Tropical forest biome	-17.4029	145.614	Australia	soil	-	1
mgm4804366.3	MGRAST	metagenome	Tropical forest biome	-17.4029	145.614	Australia	soil	-	1
mgm4808778.3	MGRAST	metagenome	cultivated environment	48.1238	-103.737	USA	soil	-	1
mgm4808782.3	MGRAST	metagenome	cultivated environment	48.1238	-103.737	USA	soil	-	1
mgm4808792.3	MGRAST	metagenome	cultivated environment	48.1238	-103.737	USA	soil	-	1
mgm4861862.3	MGRAST	metagenome	Peatland, bogs, and flooded grasslands	52.26	13.55	Sweden	soil	-	1
mgm4861871.3	MGRAST	metagenome	Peatland, bogs, and flooded grasslands	52.26	13.55	Sweden	soil	-	1
mgm4861873.3	MGRAST	metagenome	Peatland, bogs, and flooded grasslands	52.26	13.55	Sweden	soil	-	1
mgm4881260.3	MGRAST	metagenome	cultivated environment	52.8121	0.570568	United Kingdom	soil	-	1
mgm4881263.3	MGRAST	metagenome	cultivated environment	52.8121	0.570568	United Kingdom	soil	-	1
mgm4881264.3	MGRAST	metagenome	cultivated environment	52.8121	0.570568	United Kingdom	soil	-	1
mgm4881265.3	MGRAST	metagenome	cultivated environment	52.8121	0.570568	United Kingdom	soil	-	1
mgm4881266.3	MGRAST	metagenome	cultivated environment	52.8121	0.570568	United Kingdom	soil	-	1
mgm4881267.3	MGRAST	metagenome	cultivated environment	52.8121	0.570568	United Kingdom	soil	-	1
mgm4881268.3	MGRAST	metagenome	cultivated environment	52.8121	0.570568	United Kingdom	soil	-	1
mgm4881271.3	MGRAST	metagenome	cultivated environment	52.8121	0.570568	United Kingdom	soil	-	1
mgm4881272.3	MGRAST	metagenome	cultivated environment	52.8121	0.570568	United Kingdom	soil	-	1
mgm4881274.3	MGRAST	metagenome	cultivated environment	52.8121	0.570568	United Kingdom	soil	-	1
mgm4881284.3	MGRAST	metagenome	cultivated environment	52.8121	0.570568	United Kingdom	soil	-	1
mgm4882434.3	MGRAST	metagenome	cultivated environment	52.8121	0.570568	United Kingdom	soil	-	1
mgm4882435.3	MGRAST	metagenome	cultivated environment	52.8121	0.570568	United Kingdom	soil	-	1
mgm4882436.3	MGRAST	metagenome	cultivated environment	52.8121	0.570568	United Kingdom	soil	-	1
mgm4882437.3	MGRAST	metagenome	cultivated environment	52.8121	0.570568	United Kingdom	soil	-	1
mgm4882438.3	MGRAST	metagenome	cultivated environment	52.8121	0.570568	United Kingdom	soil	-	1
mgm4882440.3	MGRAST	metagenome	cultivated environment	52.8121	0.570568	United Kingdom	soil	-	1
mgm4884265.3	MGRAST	metagenome	cultivated environment	40.0672	-88.2015	USA	soil	-	1
mgm4884266.3	MGRAST	metagenome	cultivated environment	40.0672	-88.2015	USA	soil	-	1
mgm4884268.3	MGRAST	metagenome	cultivated environment	40.0672	-88.2015	USA	soil	-	1
mgm4884270.3	MGRAST	metagenome	cultivated environment	40.0672	-88.2015	USA	soil	-	1
mgm4884273.3	MGRAST	metagenome	cultivated environment	40.0672	-88.2015	USA	soil	-	1
mgm4884280.3	MGRAST	metagenome	cultivated environment	40.0672	-88.2015	USA	soil	-	1
mgm4884287.3	MGRAST	metagenome	cultivated environment	40.0672	-88.2015	USA	soil	-	1
mgm4884290.3	MGRAST	metagenome	cultivated environment	40.0672	-88.2015	USA	soil	-	1
mgm4884294.3	MGRAST	metagenome	cultivated environment	40.0672	-88.2015	USA	soil	-	1
mgm4884742.3	MGRAST	metagenome	cultivated environment	52.8121	0.570568	United Kingdom	soil	-	1
mgm4885544.3	MGRAST	metagenome	cultivated environment	40.0672	-88.2015	USA	soil	-	1
mgm4898321.3	MGRAST	metagenome	cultivated environment	-25.79	25.62	South Africa	soil	-	1
mgm4898324.3	MGRAST	metagenome	cultivated environment	-26.33	26.89	South Africa	soil	-	1
mgm4898325.3	MGRAST	metagenome	cultivated environment	-26.33	26.89	South Africa	soil	-	1
mgm4908039.3	MGRAST	metagenome	Temperate grassland biome	48.98	126.02	China	soil	-	1
mgm4908043.3	MGRAST	metagenome	Temperate grassland biome	49.13	125.6	China	soil	-	1
mgm4935430.3	MGRAST	metagenome	cultivated environment	40.0672	-88.2015	USA	soil	-	1
mgm4935431.3	MGRAST	metagenome	cultivated environment	40.0672	-88.2015	USA	soil	-	1
mgm4935432.3	MGRAST	metagenome	cultivated environment	40.0672	-88.2015	USA	soil	-	1
mgm4935433.3	MGRAST	metagenome	cultivated environment	40.0672	-88.2015	USA	soil	-	1
mgm4935434.3	MGRAST	metagenome	cultivated environment	40.0672	-88.2015	USA	soil	-	1
mgm4935435.3	MGRAST	metagenome	cultivated environment	40.0672	-88.2015	USA	soil	-	1
mgm4935436.3	MGRAST	metagenome	cultivated environment	40.0672	-88.2015	USA	soil	-	1
mgm4935437.3	MGRAST	metagenome	cultivated environment	40.0672	-88.2015	USA	soil	-	1
mgm4935438.3	MGRAST	metagenome	cultivated environment	40.0672	-88.2015	USA	soil	-	1
mgm4935439.3	MGRAST	metagenome	cultivated environment	40.0672	-88.2015	USA	soil	-	1
mgm4935440.3	MGRAST	metagenome	cultivated environment	40.0672	-88.2015	USA	soil	-	1
mgm4935441.3	MGRAST	metagenome	cultivated environment	40.0672	-88.2015	USA	soil	-	1
mgm4935442.3	MGRAST	metagenome	cultivated environment	40.0672	-88.2015	USA	soil	-	1
mgm4935443.3	MGRAST	metagenome	cultivated environment	40.0672	-88.2015	USA	soil	-	1
mgm4935444.3	MGRAST	metagenome	cultivated environment	40.0672	-88.2015	USA	soil	-	1
mgm4935445.3	MGRAST	metagenome	cultivated environment	40.0672	-88.2015	USA	soil	-	1
mgm4935446.3	MGRAST	metagenome	cultivated environment	40.0672	-88.2015	USA	soil	-	1
mgm4935447.3	MGRAST	metagenome	cultivated environment	40.0672	-88.2015	USA	soil	-	1
mgm4935448.3	MGRAST	metagenome	cultivated environment	40.0672	-88.2015	USA	soil	-	1
mgm4935449.3	MGRAST	metagenome	cultivated environment	40.0672	-88.2015	USA	soil	-	1
mgm4935450.3	MGRAST	metagenome	cultivated environment	40.0672	-88.2015	USA	soil	-	1
mgm4935451.3	MGRAST	metagenome	cultivated environment	40.0672	-88.2015	USA	soil	-	1
mgm4935452.3	MGRAST	metagenome	cultivated environment	40.0672	-88.2015	USA	soil	-	1
mgm4935453.3	MGRAST	metagenome	cultivated environment	40.0672	-88.2015	USA	soil	-	1
mgm4935454.3	MGRAST	metagenome	cultivated environment	40.0672	-88.2015	USA	soil	-	1
mgm4935455.3	MGRAST	metagenome	cultivated environment	40.0672	-88.2015	USA	soil	-	1
mgm4935456.3	MGRAST	metagenome	cultivated environment	40.0672	-88.2015	USA	soil	-	1
mgm4935514.3	MGRAST	metagenome	cultivated environment	40.0672	-88.2015	USA	soil	-	1
mgm4935516.3	MGRAST	metagenome	cultivated environment	40.0672	-88.2015	USA	soil	-	1
mgm4935517.3	MGRAST	metagenome	cultivated environment	40.0672	-88.2015	USA	soil	-	1
mgm4935518.3	MGRAST	metagenome	cultivated environment	40.0672	-88.2015	USA	soil	-	1
mgm4935519.3	MGRAST	metagenome	cultivated environment	40.0672	-88.2015	USA	soil	-	1
SRR7027735	NCBI	metagenome	Peatland, bogs, and flooded grasslands	47.5028	-93.4828	USA	soil	-	1
SRR7027738	NCBI	metagenome	Peatland, bogs, and flooded grasslands	47.5028	-93.4828	USA	soil	-	1
SRR7027739	NCBI	metagenome	Peatland, bogs, and flooded grasslands	47.5028	-93.4828	USA	soil	-	1
SRR7027740	NCBI	metagenome	Peatland, bogs, and flooded grasslands	47.5028	-93.4828	USA	soil	-	1
SRR7027741	NCBI	metagenome	Peatland, bogs, and flooded grasslands	47.5028	-93.4828	USA	soil	-	1
SRR7027742	NCBI	metagenome	Peatland, bogs, and flooded grasslands	47.5028	-93.4828	USA	soil	-	1
SRR7027743	NCBI	metagenome	Peatland, bogs, and flooded grasslands	47.5028	-93.4828	USA	soil	-	1
SRR7027744	NCBI	metagenome	Peatland, bogs, and flooded grasslands	47.5028	-93.4828	USA	soil	-	1
SRR7027745	NCBI	metagenome	Peatland, bogs, and flooded grasslands	47.5028	-93.4828	USA	soil	-	1
SRR7027752	NCBI	metagenome	Peatland, bogs, and flooded grasslands	47.5028	-93.4828	USA	soil	-	1
SRR7027753	NCBI	metagenome	Peatland, bogs, and flooded grasslands	47.5028	-93.4828	USA	soil	-	1
SRR7027795	NCBI	metagenome	Peatland, bogs, and flooded grasslands	47.5028	-93.4828	USA	soil	-	1
SRR7027822	NCBI	metagenome	Peatland, bogs, and flooded grasslands	47.5028	-93.4828	USA	soil	-	1
SRR7027823	NCBI	metagenome	Peatland, bogs, and flooded grasslands	47.5028	-93.4828	USA	soil	-	1
SRR7027834	NCBI	metagenome	Peatland, bogs, and flooded grasslands	47.5028	-93.4828	USA	soil	-	1
SRR7027835	NCBI	metagenome	Peatland, bogs, and flooded grasslands	47.5028	-93.4828	USA	soil	-	1
SRR7027836	NCBI	metagenome	Peatland, bogs, and flooded grasslands	47.5028	-93.4828	USA	soil	-	1
SRR7027837	NCBI	metagenome	Peatland, bogs, and flooded grasslands	47.5028	-93.4828	USA	soil	-	1
SRR7027860	NCBI	metagenome	Peatland, bogs, and flooded grasslands	47.5028	-93.4828	USA	soil	-	1
SRR7027862	NCBI	metagenome	Peatland, bogs, and flooded grasslands	47.5028	-93.4828	USA	soil	-	1
SRR7027863	NCBI	metagenome	Peatland, bogs, and flooded grasslands	47.5028	-93.4828	USA	soil	-	1
SRR7027864	NCBI	metagenome	Peatland, bogs, and flooded grasslands	47.5028	-93.4828	USA	soil	-	1
SRR7027865	NCBI	metagenome	Peatland, bogs, and flooded grasslands	47.5028	-93.4828	USA	soil	-	1
SRR7027866	NCBI	metagenome	Peatland, bogs, and flooded grasslands	47.5028	-93.4828	USA	soil	-	1
SRR7027867	NCBI	metagenome	Peatland, bogs, and flooded grasslands	47.5028	-93.4828	USA	soil	-	1
SRR7027868	NCBI	metagenome	Peatland, bogs, and flooded grasslands	47.5028	-93.4828	USA	soil	-	1
SRR7027877	NCBI	metagenome	Peatland, bogs, and flooded grasslands	47.5028	-93.4828	USA	soil	-	1
SRR7027918	NCBI	metagenome	Peatland, bogs, and flooded grasslands	47.5028	-93.4828	USA	soil	-	1
SRR7027980	NCBI	metagenome	Peatland, bogs, and flooded grasslands	47.5028	-93.4828	USA	soil	-	1
SRR7027994	NCBI	metagenome	Peatland, bogs, and flooded grasslands	47.5028	-93.4828	USA	soil	-	1
SRR7028008	NCBI	metagenome	Peatland, bogs, and flooded grasslands	47.5028	-93.4828	USA	soil	-	1
SRR7028199	NCBI	metagenome	Peatland, bogs, and flooded grasslands	47.5028	-93.4828	USA	soil	-	1
SRR7028227	NCBI	metagenome	Peatland, bogs, and flooded grasslands	47.5028	-93.4828	USA	soil	-	1
SRR7028231	NCBI	metagenome	Peatland, bogs, and flooded grasslands	47.5028	-93.4828	USA	soil	-	1
SRR7028236	NCBI	metagenome	Peatland, bogs, and flooded grasslands	47.5028	-93.4828	USA	soil	-	1
SRR7028244	NCBI	metagenome	Peatland, bogs, and flooded grasslands	47.5028	-93.4828	USA	soil	-	1
SRR7028363	NCBI	metagenome	Peatland, bogs, and flooded grasslands	47.5028	-93.4828	USA	soil	-	1
SRR7028364	NCBI	metagenome	Peatland, bogs, and flooded grasslands	47.5028	-93.4828	USA	soil	-	1
SRR7028380	NCBI	metagenome	Peatland, bogs, and flooded grasslands	47.5028	-93.4828	USA	soil	-	1
SRR7028477	NCBI	metagenome	Peatland, bogs, and flooded grasslands	47.5028	-93.4828	USA	soil	-	1
SRR7028480	NCBI	metagenome	Peatland, bogs, and flooded grasslands	47.5028	-93.4828	USA	soil	-	1
SRR7028484	NCBI	metagenome	Peatland, bogs, and flooded grasslands	47.5028	-93.4828	USA	soil	-	1
SRR8554483	NCBI	metagenome	Iron sulfide soils and mine tailings	63.0472	21.7116	Finland	soil	-	1
SRR8554485	NCBI	metagenome	Iron sulfide soils and mine tailings	63.0472	21.7116	Finland	soil	-	1
SRR8554501	NCBI	metagenome	Iron sulfide soils and mine tailings	63.0472	21.7116	Finland	soil	-	1
ERR2041969	NCBI	metagenome	Peatland, bogs, and flooded grasslands	4.991	-52.454	French Guiana	soil	-	0
ERR2041970	NCBI	metagenome	Peatland, bogs, and flooded grasslands	4.991	-52.454	French Guiana	soil	-	0
ERR2041970	NCBI	metagenome	Peatland, bogs, and flooded grasslands	4.991	-52.454	French Guiana	soil	-	0
ERR2041972	NCBI	metagenome	Peatland, bogs, and flooded grasslands	4.991	-52.454	French Guiana	soil	-	0
ERR2041975	NCBI	metagenome	Peatland, bogs, and flooded grasslands	4.991	-52.454	French Guiana	soil	-	0
mgm4519119.3	MGRAST	metatranscriptome	Tropical forest biome	18.3	-65.8	Puerto Rico	soil	-	0
mgm4663439.3	MGRAST	metatranscriptome	Tropical and subtropical grasslands, savannas, and shrubland biome	-29	-53	Brazil	soil	-	0
mgm4663445.3	MGRAST	metatranscriptome	Tropical and subtropical grasslands, savannas, and shrubland biome	-29	-53	Brazil	soil	-	0
mgm4663446.3	MGRAST	metatranscriptome	Tropical and subtropical grasslands, savannas, and shrubland biome	-30.3386	-54.2535	Brazil	soil	-	0
mgm4664552.3	MGRAST	metagenome	Peatland, bogs, and flooded grasslands	53.1403	-4.07098	United Kingdom	soil	-	0
mgm4664560.3	MGRAST	metagenome	Peatland, bogs, and flooded grasslands	53.1403	-4.07098	United Kingdom	soil	-	0
mgm4664569.3	MGRAST	metagenome	Peatland, bogs, and flooded grasslands	53.1403	-4.07098	United Kingdom	soil	-	0
mgm4664575.3	MGRAST	metagenome	Peatland, bogs, and flooded grasslands	53.1403	-4.07098	United Kingdom	soil	-	0
mgm4664593.3	MGRAST	metagenome	Peatland, bogs, and flooded grasslands	53.1403	-4.07098	United Kingdom	soil	-	0
mgm4750411.3	MGRAST	metagenome	Tropical forest biome	9.21918	-79.7257	Panama	dunite (~92% olivine)	-	0
mgm4750538.3	MGRAST	metagenome	Tropical forest biome	9.21918	-79.7257	Panama	dunite (~92% olivine)	-	0
mgm4750539.3	MGRAST	metagenome	Tropical forest biome	9.21918	-79.7257	Panama	dunite (~92% olivine)	-	0
mgm4750544.3	MGRAST	metagenome	Tropical forest biome	9.21918	-79.7257	Panama	dunite (~92% olivine)	-	0
mgm4751389.3	MGRAST	metagenome	Tropical forest biome	9.21918	-79.7257	Panama	dunite (~92% olivine)	-	0
mgm4751392.3	MGRAST	metagenome	Tropical forest biome	9.21918	-79.7257	Panama	dunite (~92% olivine)	-	0
mgm4751395.3	MGRAST	metagenome	Tropical forest biome	9.21918	-79.7257	Panama	dunite (~92% olivine)	-	0
mgm4751396.3	MGRAST	metagenome	Tropical forest biome	9.21918	-79.7257	Panama	dunite (~92% olivine)	-	0
mgm4751576.3	MGRAST	metagenome	Tropical forest biome	9.21918	-79.7257	Panama	dunite (~92% olivine)	-	0
mgm4751577.3	MGRAST	metagenome	Tropical forest biome	9.21918	-79.7257	Panama	dunite (~92% olivine)	-	0
mgm4751584.3	MGRAST	metagenome	Tropical forest biome	9.21918	-79.7257	Panama	dunite (~92% olivine)	-	0
mgm4751599.3	MGRAST	metagenome	Tropical forest biome	9.21918	-79.7257	Panama	dunite (~92% olivine)	-	0
mgm4761695.3	MGRAST	metatranscriptome	Tundra biome	63.88	-145.73	USA	soil	-	0
mgm4762030.3	MGRAST	metatranscriptome	Peatland, bogs, and flooded grasslands	63.88	-145.73	USA	soil	-	0
mgm4762032.3	MGRAST	metatranscriptome	Tundra biome	63.88	-145.73	USA	soil	-	0
mgm4762033.3	MGRAST	metatranscriptome	Tundra biome	63.88	-145.73	USA	soil	-	0
mgm4762035.3	MGRAST	metatranscriptome	Peatland, bogs, and flooded grasslands	63.88	-145.73	USA	soil	-	0
mgm4762036.3	MGRAST	metatranscriptome	Peatland, bogs, and flooded grasslands	63.88	-145.73	USA	soil	-	0
mgm4763085.3	MGRAST	metatranscriptome	Temperate forest biome	35.5841	-79.0539	USA	soil	-	0
mgm4763089.3	MGRAST	metatranscriptome	Temperate forest biome	35.5841	-79.0539	USA	soil	-	0
mgm4763106.3	MGRAST	metatranscriptome	Temperate forest biome	35.5841	-79.0539	USA	soil	-	0
mgm4781895.3	MGRAST	metatranscriptome	Temperate forest biome	49.0428	13.6161	Czech Republic	soil	-	0
mgm4781907.3	MGRAST	metatranscriptome	Temperate forest biome	49.045	13.6181	Czech Republic	soil	-	0
mgm4782523.3	MGRAST	metatranscriptome	Temperate forest biome	9.04306	13.6183	Czech Republic	soil	-	0
mgm4800917.3	MGRAST	metagenome	Tropical forest biome	-17.4029	145.614	Australia	dunite (~92% olivine)	-	0
mgm4800918.3	MGRAST	metagenome	Tropical forest biome	-17.4029	145.614	Australia	dunite (~92% olivine)	-	0
mgm4800919.3	MGRAST	metagenome	Tropical forest biome	-17.4029	145.614	Australia	dunite (~92% olivine)	-	0
mgm4800920.3	MGRAST	metagenome	Tropical forest biome	-17.4029	145.614	Australia	dunite (~92% olivine)	-	0
mgm4800921.3	MGRAST	metagenome	Tropical forest biome	-17.4029	145.614	Australia	dunite (~92% olivine)	-	0
mgm4800922.3	MGRAST	metagenome	Tropical forest biome	-17.4029	145.614	Australia	dunite (~92% olivine)	-	0
mgm4800923.3	MGRAST	metagenome	Tropical forest biome	-17.4029	145.614	Australia	dunite (~92% olivine)	-	0
mgm4800924.3	MGRAST	metagenome	Tropical forest biome	-17.4029	145.614	Australia	basalt	-	0
mgm4800924.3	MGRAST	metagenome	Tropical forest biome	-17.4029	145.614	Australia	basalt	-	0
mgm4800925.3	MGRAST	metagenome	Tropical forest biome	-17.4029	145.614	Australia	dunite (~92% olivine)	-	0
mgm4800926.3	MGRAST	metagenome	Tropical forest biome	-17.4029	145.614	Australia	dunite (~92% olivine)	-	0
mgm4801667.3	MGRAST	metagenome	Tropical forest biome	-17.4029	145.614	Australia	basalt	-	0
mgm4801668.3	MGRAST	metagenome	Tropical forest biome	-17.4029	145.614	Australia	basalt	-	0
mgm4801669.3	MGRAST	metagenome	Tropical forest biome	-17.4029	145.614	Australia	basalt	-	0
mgm4801670.3	MGRAST	metagenome	Tropical forest biome	-17.4029	145.614	Australia	basalt	-	0
mgm4801672.3	MGRAST	metagenome	Tropical forest biome	-17.4029	145.614	Australia	dunite (~92% olivine)	-	0
mgm4801673.3	MGRAST	metagenome	Tropical forest biome	-17.4029	145.614	Australia	basalt	-	0
mgm4801674.3	MGRAST	metagenome	Tropical forest biome	-17.4029	145.614	Australia	basalt	-	0
mgm4801675.3	MGRAST	metagenome	Tropical forest biome	-17.4029	145.614	Australia	basalt	-	0
mgm4801676.3	MGRAST	metagenome	Tropical forest biome	-17.4029	145.614	Australia	dunite (~92% olivine)	-	0
mgm4802740.3	MGRAST	metagenome	Tropical forest biome	-17.4029	145.614	Australia	dunite (~92% olivine)	-	0
mgm4802742.3	MGRAST	metagenome	Tropical forest biome	-17.4029	145.614	Australia	dunite (~92% olivine)	-	0
mgm4802744.3	MGRAST	metagenome	Tropical forest biome	-17.4029	145.614	Australia	dunite (~92% olivine)	-	0
mgm4802745.3	MGRAST	metagenome	Tropical forest biome	-17.4029	145.614	Australia	dunite (~92% olivine)	-	0
mgm4802746.3	MGRAST	metagenome	Tropical forest biome	-17.4029	145.614	Australia	dunite (~92% olivine)	-	0
mgm4802747.3	MGRAST	metagenome	Tropical forest biome	-17.4029	145.614	Australia	dunite (~92% olivine)	-	0
mgm4802748.3	MGRAST	metagenome	Tropical forest biome	-17.4029	145.614	Australia	basalt	-	0
mgm4803487.3	MGRAST	metagenome	Tropical forest biome	-17.4029	145.614	Australia	basalt	-	0
mgm4803662.3	MGRAST	metagenome	Tropical forest biome	-17.4029	145.614	Australia	basalt	-	0
mgm4803663.3	MGRAST	metagenome	Tropical forest biome	-17.4029	145.614	Australia	basalt	-	0
mgm4803664.3	MGRAST	metagenome	Tropical forest biome	-17.4029	145.614	Australia	basalt	-	0
mgm4803665.3	MGRAST	metagenome	Tropical forest biome	-17.4029	145.614	Australia	basalt	-	0
mgm4804364.3	MGRAST	metagenome	Tropical forest biome	-17.4029	145.614	Australia	basalt	-	0
mgm4870506.3	MGRAST	metatranscriptome	cultivated environment	31.0071	-91.3309	USA	soil	-	0
mgm4870510.3	MGRAST	metatranscriptome	cultivated environment	31.0129	-91.318	USA	soil	-	0
mgm4870522.3	MGRAST	metatranscriptome	cultivated environment	31.0128	-91.3174	USA	soil	-	0
mgm4928890.3	MGRAST	metatranscriptome	Peatland, bogs, and flooded grasslands	67.9266	25.3816	Finland	soil	-	0
SRR8554503	NCBI	metagenome	Iron sulfide soils and mine tailings	63.0472	21.7116	Finland	soil	-	0
SRR8554504	NCBI	metagenome	Iron sulfide soils and mine tailings	63.0472	21.7116	Finland	soil	-	0
SRR8554511	NCBI	metagenome	Iron sulfide soils and mine tailings	63.0472	21.7116	Finland	soil	-	0
SRR8554512	NCBI	metagenome	Iron sulfide soils and mine tailings	63.0472	21.7116	Finland	soil	-	0
SRR8554513	NCBI	metatranscriptome	Iron sulfide soils and mine tailings	63.0472	21.7116	Finland	soil	-	0
SRR8554514	NCBI	metatranscriptome	Iron sulfide soils and mine tailings	63.0472	21.7116	Finland	soil	-	0
SRR8554642	NCBI	metatranscriptome	Iron sulfide soils and mine tailings	63.0472	21.7116	Finland	soil	-	0
SRR8554643	NCBI	metagenome	Iron sulfide soils and mine tailings	63.0472	21.7116	Finland	soil	-	0
SRR8554647	NCBI	metatranscriptome	Iron sulfide soils and mine tailings	63.0472	21.7116	Finland	soil	-	0
SRR8554648	NCBI	metatranscriptome	Iron sulfide soils and mine tailings	63.0472	21.7116	Finland	soil	-	0
SRR8554649	NCBI	metatranscriptome	Iron sulfide soils and mine tailings	63.0472	21.7116	Finland	soil	-	0
SRR8554650	NCBI	metatranscriptome	Iron sulfide soils and mine tailings	63.0472	21.7116	Finland	soil	-	0
SRR8554651	NCBI	metatranscriptome	Iron sulfide soils and mine tailings	63.0472	21.7116	Finland	soil	-	0
SRR8554652	NCBI	metatranscriptome	Iron sulfide soils and mine tailings	63.0472	21.7116	Finland	soil	-	0
