# Supplementary material for: Contrasting microbial communities drive iron cycling across global biomes
Source: Research Square preprint supplement (doi:10.21203/rs.3.rs-4248419/v1), 2024-04-25
Supplement: Supplementary file 3 [file caa65167f58d3c30aa8d2422.xlsx]

## Sheet: Sheet1
Supplementary Information File 2 (Epihov and Bryce, 2024). Contents of the IRcyc-A database
Gene name	Count of unique homologues present in IRcyc-A	subtype	type	class
acbC	134	acinetoferrin	acinetoferrin	hydroxamate siderophores
acbC-like	9	acinetoferrin-like	acinetoferrin	hydroxamate siderophores
acsC	268	achromobactin	achromobactin	carboxylate siderophores
acsC-like	51	achromobactin-like	achromobactin	carboxylate siderophores
aentE	45	protochelin, azotochelin, aminochelin	protochelin, azotochelin, aminochelin	catecholate siderophores
aentE-like	4	protochelin, azotochelin, aminochelin-like	protochelin, azotochelin, aminochelin	catecholate siderophores
alcC	194	alcaligin	alcaligin	hydroxamate siderophores
alcC-like	88	alcaligin-like	alcaligin	hydroxamate siderophores
angR	20	anguibactin	anguibactin	mixed ligand siderophores
angR-like	4	anguibactin-like	anguibactin	mixed ligand siderophores
asbC	466	petrobactin	petrobactin	mixed ligand siderophores
asbC-like	106	petrobactin-like	petrobactin	mixed ligand siderophores
basE	404	acinetobactin	acinetobactin	catecholate siderophores
basE-like	3	acinetobactin-like	acinetobactin	catecholate siderophores
bfnD	108	baumannoferrin	baumannoferrin	hydroxamate siderophores
bfnD-like	9	baumannoferrin-like	baumannoferrin	hydroxamate siderophores
bibC	13	bisucaberin	bisucaberin	hydroxamate siderophores
bibC-like	23	bisucaberin-like	bisucaberin	hydroxamate siderophores
cbsE	236	chrysobactin	chrysobactin	catecholate siderophores
cbsE-like	2	chrysobactin-like	chrysobactin	catecholate siderophores
cntL	109	staphylopine	staphylopine	carboxylate siderophores
cntL-like	46	staphylopine-like	staphylopine	carboxylate siderophores
cpcE	78	cepaciachelin	cepaciachelin	catecholate siderophores
cpcE-like	25	cepaciachelin-like	cepaciachelin	catecholate siderophores
desB	997	desferroxamine B/E	desferroxamine B/E	hydroxamate siderophores
desB-like	3	desferroxamine B/E-like	desferroxamine B/E	hydroxamate siderophores
desD	963	desferroxamine E	desferroxamine E	hydroxamate siderophores
desD-like	8	desferroxamine E-like	desferroxamine E	hydroxamate siderophores
dhbE	596	bacillibactin	bacillibactin	catecholate siderophores
dhbE-like	12	bacillibactin-like	bacillibactin	catecholate siderophores
entE	1153	enterobactin	enterobactin	catecholate siderophores
entE-like	68	enterobactin-like	enterobactin	catecholate siderophores
Fer3	10	ferrichrome A	ferrichrome A	hydroxamate siderophores
gdhbE	324	griseobactin	griseobactin	catecholate siderophores
gdhbE-like	17	griseobactin-like	griseobactin	catecholate siderophores
htbE	95	heterobactin	heterobactin	mixed ligand siderophores
htbE-like	25	heterobactin-like	heterobactin	mixed ligand siderophores
iroB	645	salmochelin	salmochelin	catecholate siderophores
iroB-like	26	salmochelin-like	salmochelin	catecholate siderophores
iucC	395	aerobactin	aerobactin	hydroxamate siderophores
iucC-like	114	aerobactin-like	aerobactin	hydroxamate siderophores
lepA	16	leporin B	leporin B	hydroxamate siderophores
lepA-like	30	leporin B-like	leporin B	hydroxamate siderophores
mbaB	75	malleobactin	malleobactin	hydroxamate siderophores
mbtA	413	mycobactin	mycobactin	mixed ligand siderophores
mbtA-like	444	mycobactin-like	mycobactin	mixed ligand siderophores
mxcE	121	myxochelin	myxochelin	catecholate siderophores
mxcE-like	9	myxochelin-like	myxochelin	catecholate siderophores
orbJ	157	ornibactin	ornibactin	hydroxamate siderophores
orbJ-like	11	ornibactin-like	ornibactin	hydroxamate siderophores
pchD	200	pyochelin	pyochelin	catecholate siderophores
pchD-like	35	pyochelin-like	pyochelin	catecholate siderophores
pmsE	222	pseudomonine	pseudomonine	hydroxamate siderophores
pmsE-like	36	pseudomonine-like	pseudomonine	hydroxamate siderophores
pubC	91	putrebactin	putrebactin	hydroxamate siderophores
pubC-like	47	putrebactin-like	putrebactin	hydroxamate siderophores
pvdJ	52	pyoverdine	pyoverdine	mixed ligand siderophores
pvdJ-like	143	pyoverdine-like	pyoverdine	mixed ligand siderophores
rhbF	14	rhizobactin 1021	rhizobactin 1021	carboxylate siderophores
rhbF-like	2	rhizobactin 1021-like	rhizobactin 1021	carboxylate siderophores
sbnF	167	staphyloferrin B	staphyloferrin B	carboxylate siderophores
sbnF-like	25	staphyloferrin B-like	staphyloferrin B	carboxylate siderophores
schE	62	serratiochelin	serratiochelin	catecholate siderophores
schE-like	180	serratiochelin-like	serratiochelin	catecholate siderophores
sentE	46	spirilobactin	spirilobactin	catecholate siderophores
sentE-like	6	spirilobactin-like	spirilobactin	catecholate siderophores
sfnaD	154	staphyloferrin A	staphyloferrin A	mixed ligand siderophores
sfnaD-like	73	staphyloferrin A-like	staphyloferrin A	mixed ligand siderophores
Sid2	15	ferrichrome	ferrichrome	hydroxamate siderophores
Sid2-like	3	ferrichrome-like	ferrichrome	hydroxamate siderophores
vabE	42	vanchrobactin	vanchrobactin	catecholate siderophores
vabE-like	16	vanchrobactin-like	vanchrobactin	catecholate siderophores
vbsS	95	vicibactin	vicibactin	hydroxamate siderophores
vbsS-like	66	vicibactin-like	vicibactin	hydroxamate siderophores
vibE	85	vibriobactin	vibriobactin	catecholate siderophores
vibE-like	16	vibriobactin-like	vibriobactin	catecholate siderophores
ybtE	243	yersiniabactin	yersiniabactin	mixed ligand siderophores
ybtE-like	95	yersiniabactin-like	yersiniabactin	mixed ligand siderophores
cyc2	203	Acidithiobacillus-type	Fe(II)-oxidation	Fe(II)-oxidation
foxE	44	Rhodopseudomonas type	Fe(II)-oxidation	Fe(II)-oxidation
MtrA/DmsE	1435	Fe(III)-reduction and Fe(II)-oxidation MtoAB/PioAB	Fe(III)-reduction and Fe(II)-oxidation MtoAB/PioAB	Fe(III)-reduction
MtrB/PioB	731	Fe(III)-reduction and Fe(II)-oxidation MtoAB/PioAB	Fe(III)-reduction and Fe(II)-oxidation MtoAB/PioAB	Fe(III)-reduction
MtrC/OmcA	844	Fe(III)-reduction and Fe(II)-oxidation MtoAB/PioAB	Fe(III)-reduction and Fe(II)-oxidation MtoAB/PioAB	Fe(III)-reduction
omcS	42	Geobacter Fe(III)-reduction	Geobacter Fe(III)-reduction	Fe(III)-reduction
rpoA	28591	universal single-copy gene marker	universal single-copy gene marker	universal single-copy gene marker
Similar_to_siderophores_group_3three (c.1)	883	specific-filter	specific-filter	specific-filter
Similar_to_siderophores_group_4four (c.2)	607	specific-filter	specific-filter	specific-filter
Similar_to_siderophores_group_5five (c.3)	10945	specific-filter	specific-filter	specific-filter
KO_paralogs_for_siderophores	36275	specific-filter	specific-filter	specific-filter
Paralogs_for_iron_red_ox_genes	15001	specific-filter	specific-filter	specific-filter
Paralog for rpoA (K09801)	5609	specific-filter	specific-filter	specific-filter
SwissProt Uniprot (after clean-up for matching seqs against the IRcyc-A, seqs with id<70 were left)	567085	general-filter	general-filter	general-filter
Total	679698	-	-	-
